# Supplementary material for: Hereditary predisposition to malignant myeloid hemopathies: Caution in use of saliva and guideline based on our experience
Source: Frontiers journal article supplement (doi:10.3389/fonc.2023.1120829), 2023-02-27
Supplement: Data_Sheet_1.zip [file Data_Sheet_1.zip]

# Supplementary Figure

**
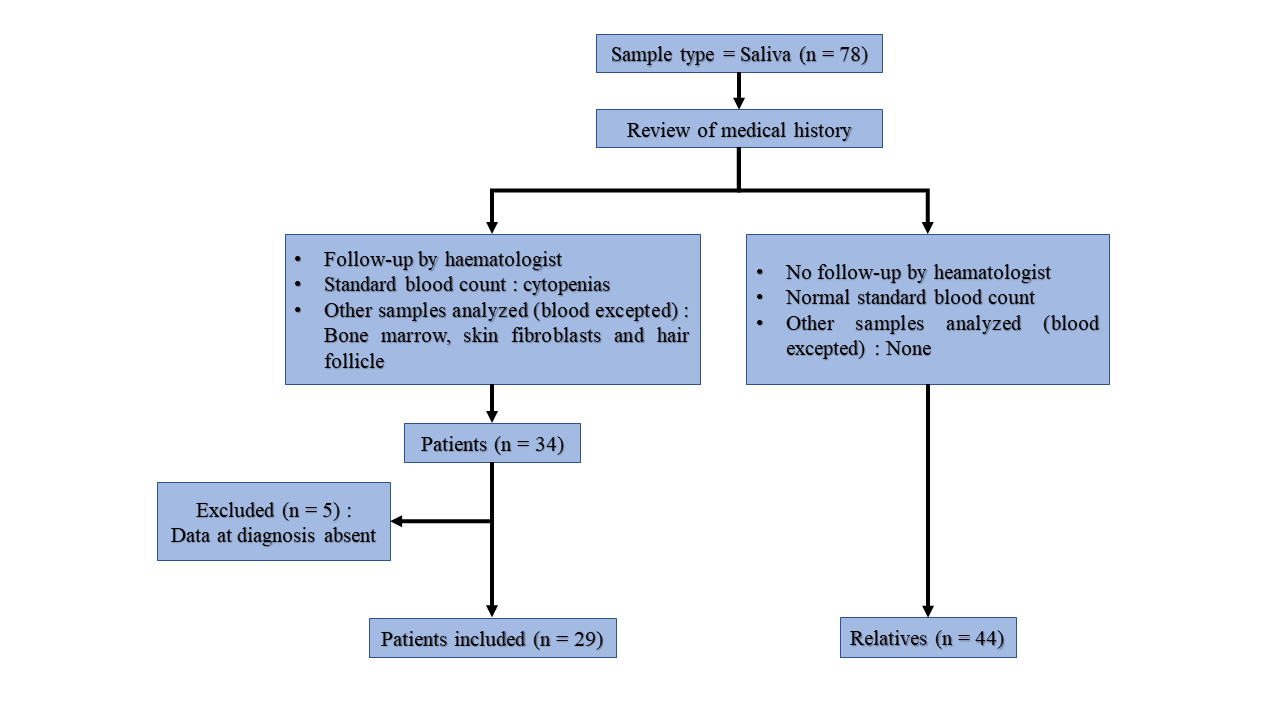
**

**Figure S1: Flowchart of our study.** Inclusion of patients and relatives was retrospective. Patients were distinguished from their relatives by study of medical history and review of analysis available.
